# Supplementary material for: Epoxidation of Methyl Esters as Valuable Biomolecules: Monitoring of Reaction
Source: MDPI journal article supplement (doi:10.3390/molecules28062819), 2023-03-21
Supplement: s1 [file s1]

# Epoxidation of Methyl Esters as Valuable Biomolecules: Monitoring of Reaction

Martin Hájek <sup>1</sup>, Tomáš Hájek <sup>2,\*</sup>, David Kocián <sup>1</sup>, Karel Frolich <sup>1</sup>, András Peller <sup>3</sup>

<sup>1</sup> Department of Physical Chemistry, Faculty of Chemical Technology, University of Pardubice, Studentská 95, 532 10 Pardubice, Czech Republic

<sup>2</sup> Department of Analytical Chemistry, Faculty of Chemical Technology, University of Pardubice, Studentská 95, 532 10 Pardubice, Czech Republic

<sup>3</sup> Faculty of Chemical and Food Technology, Slovak University of Technology in Bratislava, Radlinského 9, 81237 Bratislava, Slovakia

\* Corresponding author: Tomas.Hajek@upce.cz

Figure S1: <sup>1</sup>H NMR for methyl esters and epoxidized methyl esters of *Camelia sativa* oil.

## methyl esters

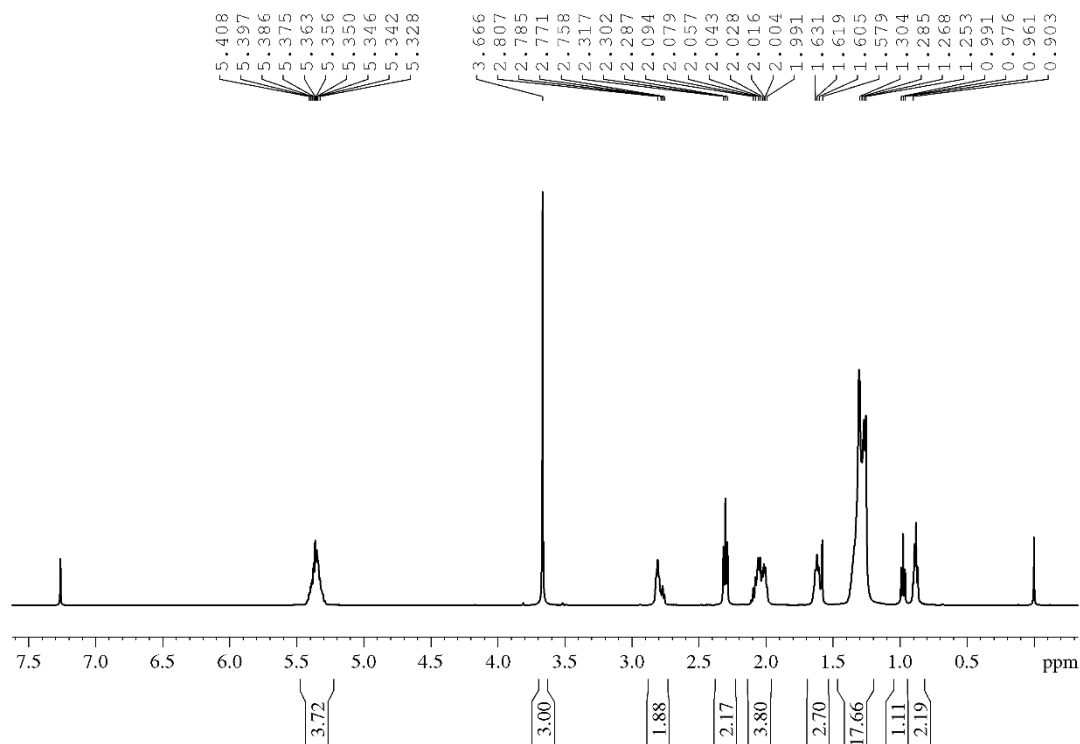

# epoxidized methyl esters

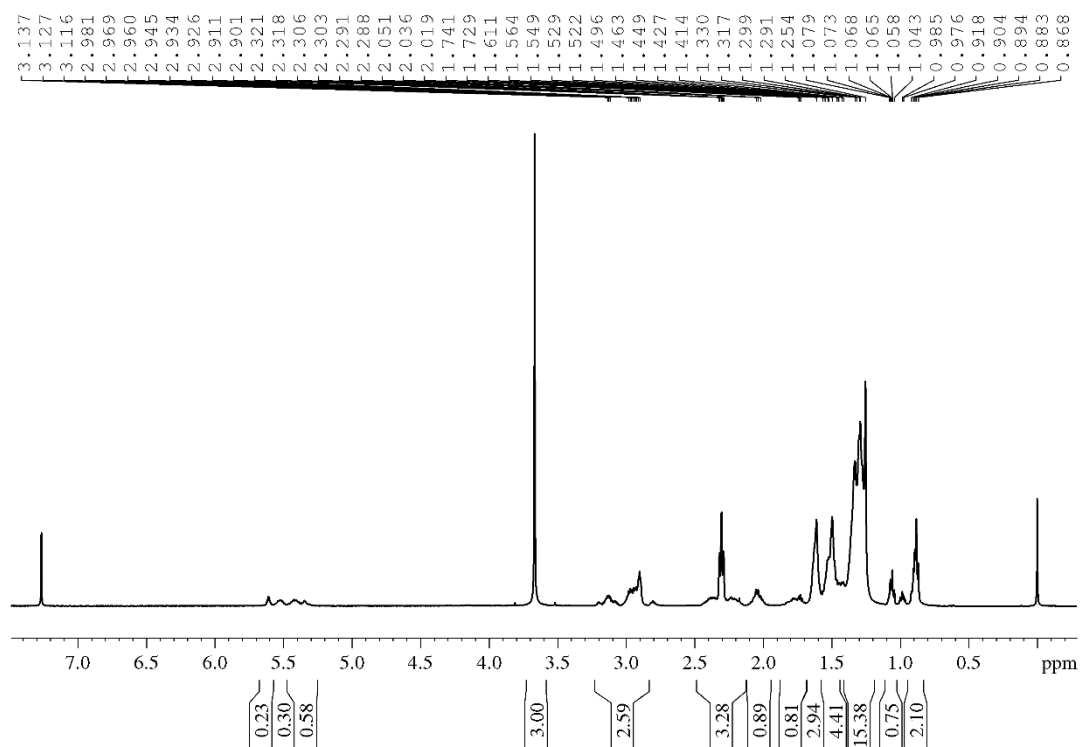

**Table S1.** Retention time ( $t_r$ ) of fatty acid methyl esters and products of epoxidation

| Compounds                      | $t_r$ (min) |
|--------------------------------|-------------|
| <i>Methyl esters</i>           |             |
| C16                            | 16.95       |
| C17 IS                         | 18.31       |
| C18:0                          | 19.78       |
| C18:1                          | 20.45       |
| C18:2                          | 21.56       |
| C18:3                          | 22.97       |
| C20:0                          | 23.12       |
| C20:1                          | 23.91       |
| C20:2                          | 25.21       |
| C22:0                          | 26.91       |
| C22:1                          | 27.81       |
| C24:0                          | 31.30       |
| <i>products of epoxidation</i> |             |
| C18:1 1-Ep                     | 32.17       |
| C18:2 1-Ep I                   | 33.08       |
| C18:2 1-Ep II                  | 33.26       |
| C18:3 1-Ep I                   | 34.60       |
| C18:3 1-Ep II                  | 35.11       |
| C18:3 1-Ep III                 | 35.27       |
| C20:1 1-Ep                     | 36.82       |
| C20:2 1-Ep I                   | 37.81       |
| C20:2 1-Ep I                   | 38.07       |
| C22:1 1-Ep                     | 42.24       |
| C18:2 2-Ep I                   | 48.85       |
| C18:2 2-Ep II                  | 49.26       |
| C18:3 2-Ep I                   | 52.19       |
| C18:2 2-Ep III                 | 53.71       |
| C18:3 2-Ep II                  | 56.58       |
| C18:3 2-Ep III                 | 57.14       |
| C18:3 2-Ep IV                  | 58.39       |
